# Supplementary material
Source: PubMed Central journal article supplement (PMC3862052)
Supplement: brc-0008-0348-s01.pdf [file brc-0008-0348-s01.pdf]

# Comparison of Ductoscopy, Galactography and Imaging Modalities for the Evaluation of Intraductal Lesions: A Critical Review

Ozgur Sarica<sup>a</sup> Enis Ozturk<sup>b</sup> Huseyin C. Demirkurek<sup>c</sup> Fatih Uluc<sup>a</sup>

<sup>a</sup>Department of Radiology, Taksim Education and Research Hospital,

<sup>b</sup>Department of Radiology, Bakirkoy Education and Research Hospital,

<sup>c</sup>Department of Nuclear Medicine, Taksim Education and Research Hospital, Istanbul, Turkey

**Table 1.** Endoscopic classification of intraductal lesions

| Mass type                                         | Benign papillary lesion | Breast cancer         |
|---------------------------------------------------|-------------------------|-----------------------|
| Papillary-polypoid                                |                         |                       |
| Solitary                                          | +++                     | +                     |
| Multiple                                          |                         | +++                   |
| Color (Red/white)                                 | N/A                     | N/A                   |
| Superficial flat protrusion                       | +                       | +++                   |
| Color (red/white)                                 | +                       | +++ if white in color |
| Circumferential, obstructing, irregular fungating | +                       | +++                   |
| Color (red/white)                                 | +                       | +++ if red in color   |

+ refers to lower probability

N/A not applicable

+++ refers to higher probability

Adapted from Japanese association of mammary ductoscopy

**Table 2.** Comparison of detection rates of intraductal abnormalities with galactography and ductoscopy

|                     |        | Ductoscopy  | Galactography |
|---------------------|--------|-------------|---------------|
| Hunerbein et al(39) | n (38) | 76% (29/38) | 68% (26/38)   |
| Yamamoto et al (40) | n (40) | 92% (37/40) | 82% (33/40)   |
| Dietz et al (7)     | n (63) | 90% (57/63) | 76% (48/63)   |

**Table 3.** Comparison of malignant lesion (cancer) detection rates in patients with PND for all diagnostic modalities and cytologic analysis, with the exception of ductoscopy, which determines the lesions but cannot make the benign-malignant discrimination

|                                   | Sensitivity | Specificity | Reference                                    |
|-----------------------------------|-------------|-------------|----------------------------------------------|
| Mammography                       | 10–68%      | 61.5–100%   | [35, 41, 42, 43, 44, 45, 46]                 |
| Ultrasonography                   | 32–80%      | 61–94%      | [12, 35, 43, 44, 45]                         |
| MRI                               | 44–94%      | 62–80%      | [41, 43, 44, 46, 47]                         |
| Galactography                     | 54–83%      | 0–98%       | [12, 42, 43, 45, 47, 48, 49, 50, 51, 52, 53] |
| Nipple discharge cytology         | 11–73%      | 59–100%     | [11, 12, 42, 46, 54, 55, 56, 57]             |
| Cytologic analysis of MD specimen | 47%         | 92%         | [11]                                         |
| Ductoscopy                        | 73–89%**    | 20–77%**    | [2, 15]                                      |

\*\* All detectable lesions (both benign and malignant) determined by ductoscopy.

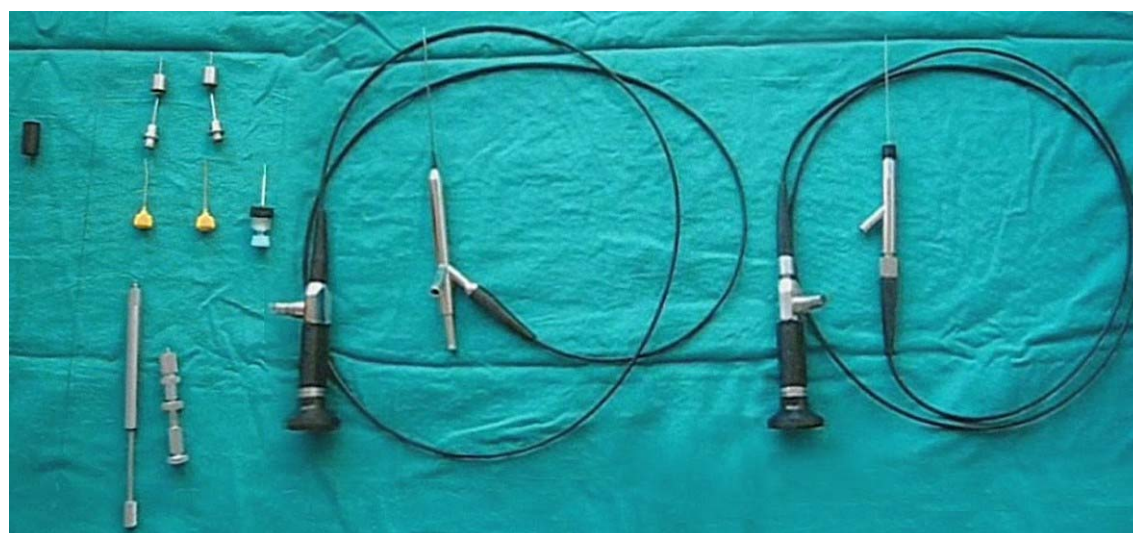

**Fig. 1.** The fiberoptic ductoscope and related equipment (courtesy of Omer Bender).

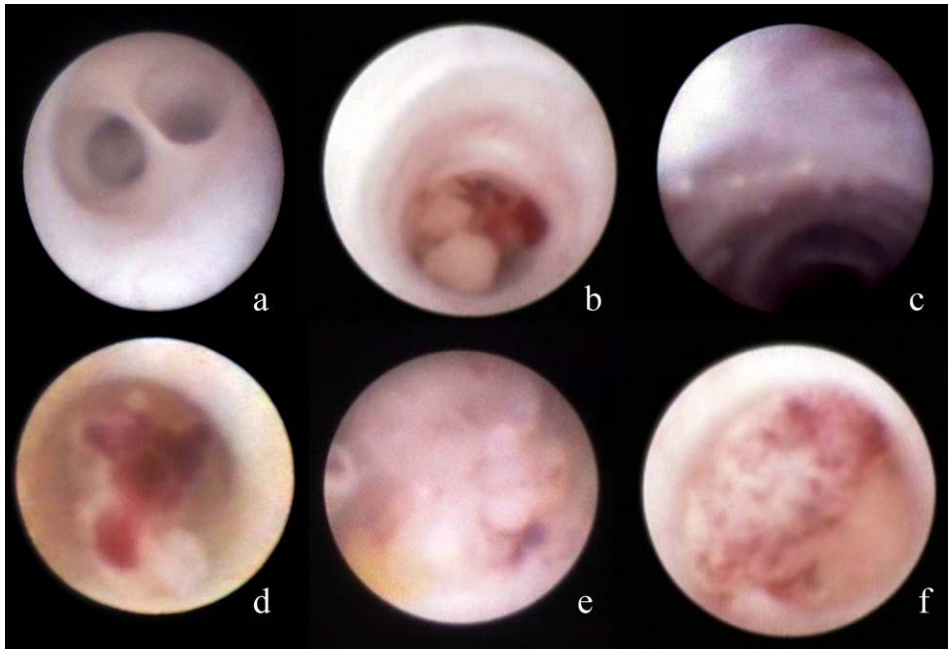

**Fig. 2.** Images from MD showing (A) a normal duct, (B) a large papilloma with hemorrhage, (C) slightly exophytic DCIS lesions, (D) a raspberry-like papilloma, (E) a papilloma with lobulated surface, (F) a huge papilloma with irregular hemorrhagic surface (courtesy of Omer Bender).

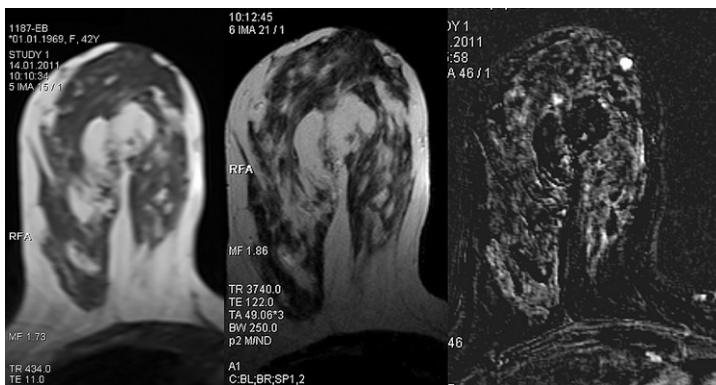

**Fig. 3.** MRI appearances of a periareolar papilloma with a dimension of 5 × 6 mm.

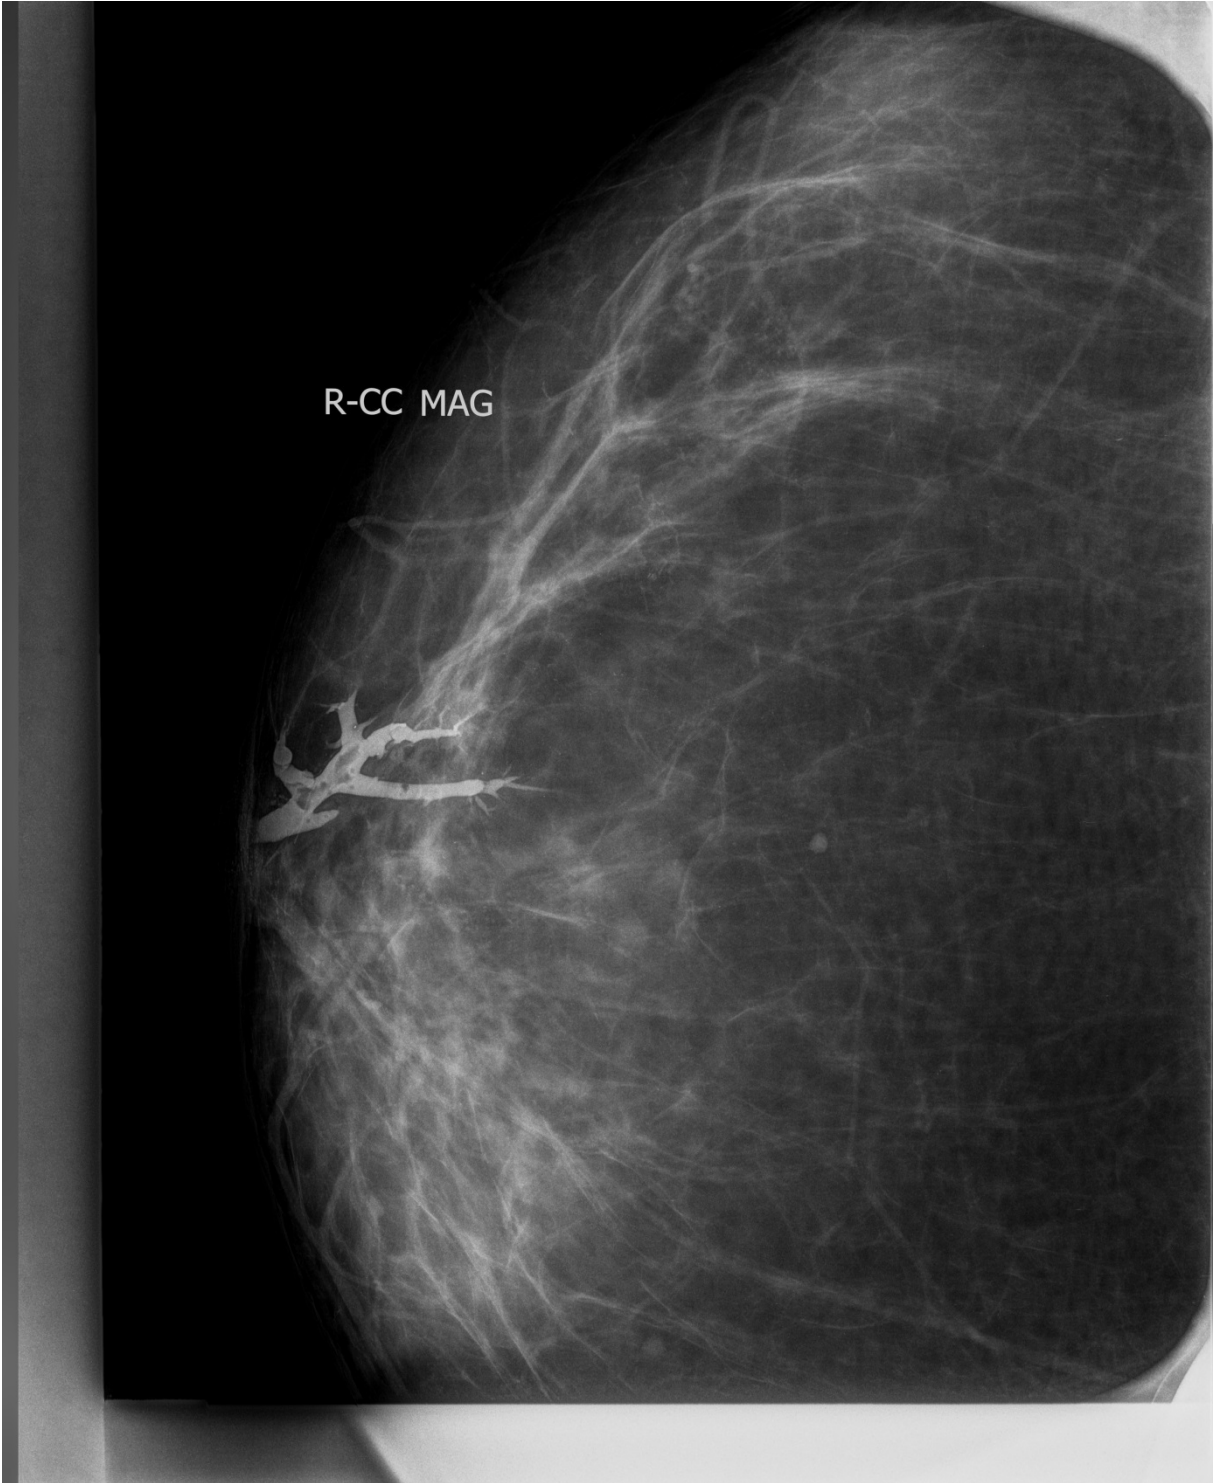

**Fig. 4.** Intraductal filling defects visualized by galactography.
